# Supplementary material for: “Anti-electrostatic” halogen bonding in solution
Source: Royal Society of Chemistry journal article supplement (doi:10.1039/d1sc01863a), 2021-01-01
Supplement: d1sc01863a1.pdf [file d1sc01863a1.pdf]

## Supporting Information

### “Anti-electrostatic” halogen bonding in solution

Cody Loy,<sup>a</sup> Jana M. Holthoff,<sup>b</sup> Robert Weiss,<sup>c</sup> Stefan M. Huber,<sup>\*b</sup> and Sergiy V. Rosokha<sup>\*a</sup>

| Table of Content                                                                                                                                                     | Pages |
|----------------------------------------------------------------------------------------------------------------------------------------------------------------------|-------|
| Details of UV-Vis measurements and calculations of the equilibria constants                                                                                          | S2    |
| Figure S1. Dependence of $\Delta$ Abs on concentration of I <sup>-</sup> for the solutions of <b>1</b> in CH <sub>3</sub> CN                                         | S4    |
| Figure S2. UV-Vis spectra of mixtures of iodide with TDACl (A) or 2TDA (B) in CH <sub>3</sub> CN                                                                     | S4    |
| Figure S3. Dependence of NMR shift of proton of <b>2</b> on concentration of I <sup>-</sup> in CD <sub>3</sub> CN                                                    | S5    |
| Figure S4. Dependence of UV-Vis spectra and $\Delta$ Abs on concentration of I <sup>-</sup> for the solutions of <b>1</b> in CH <sub>2</sub> Cl <sub>2</sub>         | S5    |
| Figure S5. Dependence of UV-Vis spectra and $\Delta$ Abs on concentration of Br <sup>-</sup> for the solutions of <b>1</b> in CH <sub>3</sub> CN                     | S6    |
| Figure S6. Dependence of UV-Vis spectra and $\Delta$ Abs on concentration of Cl <sup>-</sup> for the solutions of <b>1</b> in CH <sub>3</sub> CN                     | S6    |
| Figure S7. Optimized geometries, AIM and NCI analysis of the AEXB [ <b>1</b> , Br <sup>-</sup> ] and [ <b>1</b> , Cl <sup>-</sup> ] complexes                        | S7    |
| Table S1. Characteristics of the (3,-1) bond critical points along I <sup>-</sup> ⋯X <sup>-</sup> halogen bonds in the AEXB [ <b>1</b> , X <sup>-</sup> ] complexes. | S7    |
| Figure S8. MO shapes and energies, and electronic transitions in the AEXB [ <b>1</b> , X <sup>-</sup> ] complexes                                                    | S7    |
| Table S2. Energies and HOMO/LUMO energies of the calculated AEXB [ <b>1</b> , X <sup>-</sup> ] complexes                                                             | S8    |
| Table S3. Calculated characteristics of the hypothetical anion- $\pi$ [ <b>1</b> , X <sup>-</sup> ] complexes.                                                       | S9    |
| Atomic coordinates of the optimized AEXB complexes                                                                                                                   | S9    |

---

<sup>a</sup> Department of Chemistry  
Ball State University  
Muncie, Indiana 47306 USA  
E-mail: svrosokha@bsu.edu

<sup>b</sup> Fakultät für Chemie und Biochemie  
Ruhr-Universität Bochum  
Universitätsstr. 150, 44801 Bochum, Germany  
E-mail: stefan.m.huber@rub.de

<sup>c</sup> Institut für Organische Chemie  
Friedrich-Alexander-Universität Erlangen-Nürnberg  
Henkestr. 42, 91054 Erlangen, Germany

### Details of the UV-Vis measurements and evaluation of equilibrium constant K.

Formation constants (K), of the XB complexes [**1**, X<sup>-</sup>] between 1,2-bis(dicyanomethylene)-3-iodo-cyclopropanide anion (**1**) (taken as salt with tris(dimethylamino)cyclopropenium counter-ions) and halide anions (X = Cl, Br, I) were established via UV-Vis measurements of the acetonitrile or dichloromethane solutions containing mixtures of these reactants. The measurements were carried out under argon atmosphere (in a Teflon-capped 1 mm-cuvette equipped with a sidearm) on a CARY 500 spectrophotometer at 22 °C. For each [**1**, X<sup>-</sup>] complex, the values of K were established based on the UV-Vis measurements of 3 - 5 series of solutions. Each series included 10 - 18 solutions. The concentrations of **1** (about 1 mM) were kept constant in each series and the concentrations of halides varied from 0 to 0.25 M. (Halides were taken as salts with tetra-*n*-butyl- or tetra-*n*-propylammonium cations, Bu<sub>4</sub>NX or Pr<sub>4</sub>NX, measurements with both cations afforded the same - within accuracy limit - formation constants). The ionic strength of the solutions was kept constant with Bu<sub>4</sub>NPF<sub>6</sub>.

In a typical series of measurements, stock solutions of individual **1** (10.0 mL, ~2.0 mM), Bu<sub>4</sub>NX (5.00 mL, 0.50 M) and Bu<sub>4</sub>NPF<sub>6</sub> (5.00 mL, 0.50 M) in CH<sub>3</sub>CN (or CH<sub>2</sub>Cl<sub>2</sub>) were prepared in Schlenk tubes under Ar atmosphere. (The solvents were freshly distilled over P<sub>2</sub>O<sub>5</sub> under argon.) Then, 0.500 mL of the solution of **1** were mixed in Teflon-capped (1 mm) cuvettes with x mL of stock solution of Bu<sub>4</sub>NX and (0.500-x) mL of 0.50 M solution of Bu<sub>4</sub>NPF<sub>6</sub> (where x typically were 0.500, 0.400, 0.330, 0.250, 0.200, 0.160, 0.130, 0.100, 0.080, 0.065, 0.050, 0.035, 0.020 or similar numbers) using gas-tight micro syringes with capacities from 0.050 mL to 0.500 mL. The UV-vis spectra were measured immediately after mixing. (Control experiments taken 5 – 20 min after mixing showed no substantial changes of absorption of the solutions containing **1** and I<sup>-</sup> or Br<sup>-</sup> anions. However, small spectral changes were observed in solutions with Cl<sup>-</sup> anions if measurements were repeated 10 – 20 min after mixing.) Alternatively, series of UV-Vis measurements with I<sup>-</sup> or Br<sup>-</sup> anions were done by mixing 0.250 mL of the stock solution of **1** (prepared as described above) with 0.250 mL of the stock solution of Bu<sub>4</sub>NX in Teflon-capped (1 mm) cuvettes equipped with a sidearm (solution A). Separately, 5.0 mL of the stock solution of **1** was mixed with 5.0 mL of a 0.50 M-solution of Bu<sub>4</sub>NPF<sub>6</sub> in acetonitrile (solution B with the same concentration of **1** and ionic strength as solution A). After measuring the UV-Vis spectrum of solution A, x ml portions of the diluted solution B (where x = 0.125, 0.150, 0.200, 0.250, 0.300, 0.400, 0.500, 0.600, 0.750, 0.900, 1.000, 1.500, 2.000 or similar number) were added progressively and the spectra were measured after each addition. Since the concentration of **1** and the ionic strength of solution B are the same as solution A, an addition of B to A decreased concentration of iodide in the mixture, but kept the concentration of **1** and the ionic strength constant. Thus, regardless of the method of preparation of the solutions for the UV-Vis measurements, the concentrations of **1** and the ionic strength were kept constant, and the concentrations of Bu<sub>4</sub>NX varied in a series of measurements; and the values of

formation constants derived from both types of the UV-Vis experiments were the same within the accuracy limit, except for the studies of interaction of **1** with  $\text{Cl}^-$ . Since slow side reactions were observed in the solutions containing mixtures of **1** and  $\text{Cl}^-$ , UV-Vis measurements of the interaction of  $\text{Cl}^-$  with **1** were done only using the first method, i.e. each measurement was done immediately after mixing of the reactants.

Formation constants of complexes [**1**,  $\text{X}^-$ ],  $K$  in Table 1 were established via regression analysis of the UV-Vis data. An addition of  $\text{X}^-$  anions to the solutions of **1** leads to the formation of XB complexes

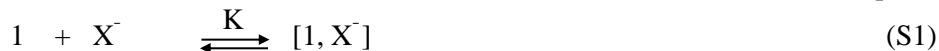

The formation constant of the complex,  $K$ , is expressed as

$$K = C_{\text{com}} / ((C_1^0 - C_{\text{com}})(C_X^0 - C_{\text{com}})) \quad (\text{S2})$$

where  $C_{\text{com}}$ ,  $C_1^0$  and  $C_X^0$  are equilibrium concentration of complex and initial concentrations of **1** and halide in the mixture. Solving equation S2 leads to expression for concentration of complex as:

$$C_{\text{com}} = \{(C_1^0 + C_X^0 + 1/K) - ((C_1^0 + C_X^0 + 1/K)^2 - 4C_1^0 C_X^0)^{0.5}\} / 2 \quad (\text{S3})$$

The changes of absorption intensity at a certain wavelength upon formation of complex are

$$\Delta\text{Abs} = (\varepsilon_{\text{com}} \times C_{\text{com}} + \varepsilon_1 \times (C_1^0 - C_{\text{com}}) + \varepsilon_X \times (C_X^0 - C_{\text{com}})) - (\varepsilon_1 \times C_1^0 + \varepsilon_X \times C_X^0) l \quad (\text{S4})$$

where  $\varepsilon_{\text{com}}$ ,  $\varepsilon_1$ , and  $\varepsilon_X$  are extinction coefficients of complex, **1** and  $\text{X}^-$  at this wavelength and  $l$  is length of the UV-Vis cuvette. Since the extinction coefficients of the halide salts (and their absorption) were negligible in the spectral range which was used in the analysis,  $\Delta\text{Abs}$  can be expressed as:

$$\Delta\text{Abs} = \Delta\varepsilon l \times C_{\text{com}} \quad (\text{S5})$$

where  $\Delta\varepsilon$  is a difference in extinction coefficients of complex and **1**. Thus, values of  $\Delta\text{Abs}$  measured in a series of solutions with the same concentration of **1** and variable concentration of  $\text{X}^-$  can be expressed as:

$$\Delta\text{Abs} = \Delta\varepsilon l \times C_{\text{com}} = \varepsilon l \times \{(C_1^0 + C_X^0 + 1/K) - ((C_1^0 + C_X^0 + 1/K)^2 - 4C_1^0 C_X^0)^{0.5}\} / 2 \quad (\text{S6})$$

Fittings of the results of the UV-Vis titrations to eq. S6 was done using Origin Pro 2016 (with  $\Delta\text{Abs}$  and  $C_X^0$  as dependent and independent variables  $y$  and  $x$ , respectively,  $C_1^0$  as a constant and  $\Delta\varepsilon$  and  $K$  as adjustable parameters). Such fittings (illustrated in Figures S1-S4) produced values of  $K$  and  $\Delta\varepsilon$  in Table 1.

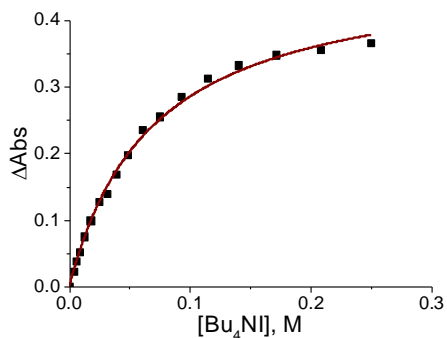

**Figure S1.** Dependence of differential absorbance  $\Delta\text{Abs}$  (obtained by subtraction of absorption of components from the absorption of the mixture) on the concentration of  $\text{Bu}_4\text{I}$  in the acetonitrile solutions containing 0.8 mM of **1** and  $\text{Bu}_4\text{NI}$  (ionic strength was kept constant with  $\text{Bu}_4\text{NPF}_6$ ).

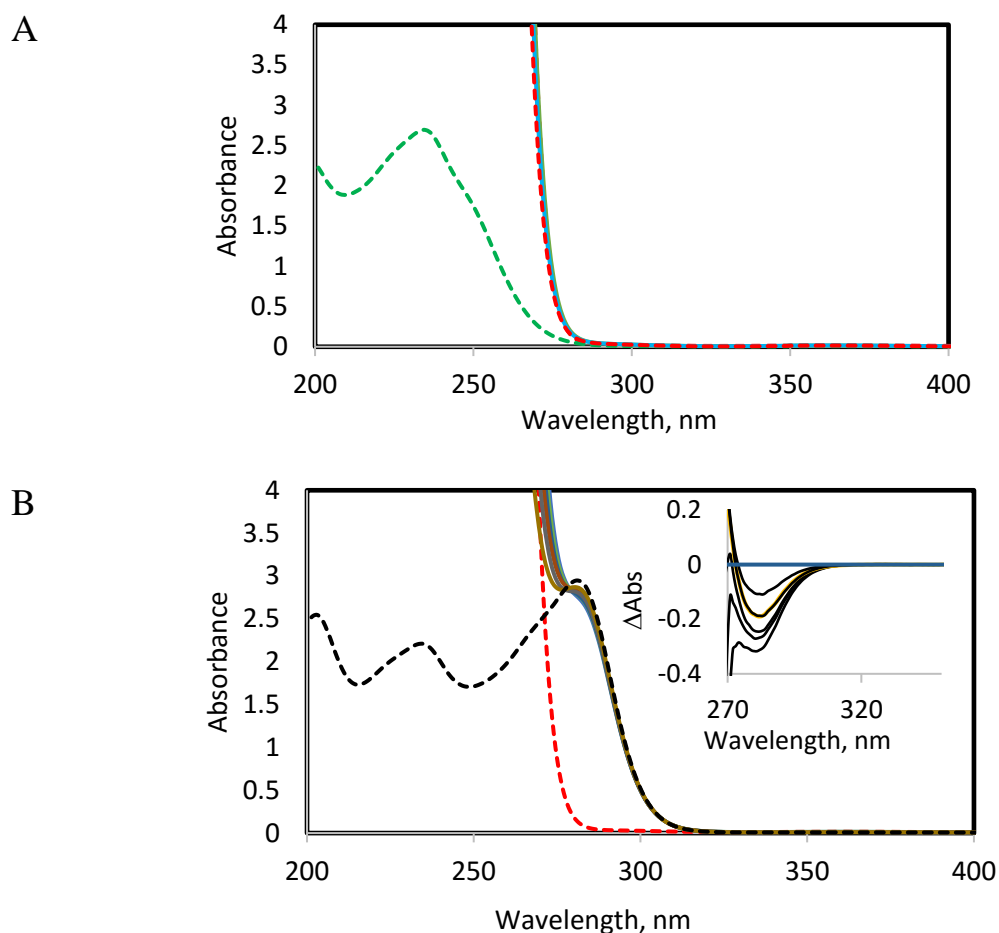

**Figure S2.** (A) Spectra of acetonitrile solutions of 1.5 mM **TDACl** (green dashed line), 250 mM  $\text{Bu}_4\text{NI}$  (red dashed line) and their mixtures (solid line) with the same concentrations of components. (B) Spectra of acetonitrile solutions with constant concentration of **2TDA** (2.0 mM) and various concentrations of  $\text{Bu}_4\text{NI}$  (from 0 to 250 mM). Dashed lines show spectra of the individual solutions of 2.0 mM **2TDA** (black) and of 250 mM  $\text{Bu}_4\text{NI}$  (red). Ionic strength was maintained with  $\text{Bu}_4\text{NPF}_6$ . Insert: Differential spectra of the solutions obtained by subtraction of the absorption of components from the spectra of their mixtures.

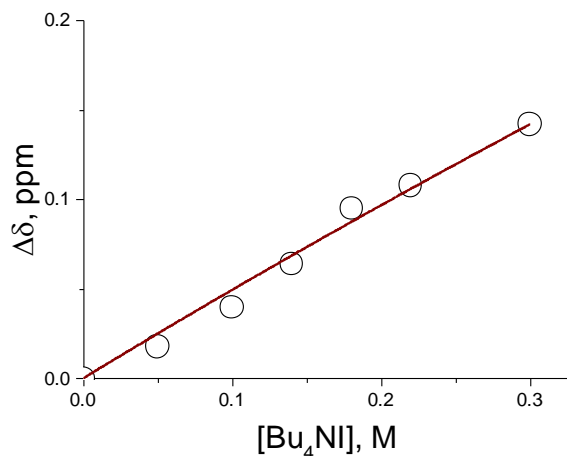

**Figure S3.** Dependence NMR shifts of the protons of **2** on the concentration of I<sup>-</sup> anions in the solutions with constant initial concentration of **2** of 11 mM (as compared to the chemical shift of the individual **2**, in CD<sub>3</sub>CN, 22°C, ionic strength was maintained with Bu<sub>4</sub>NPF<sub>6</sub>) Solid line represent a fit of the data to the expression  $\Delta\delta = \Delta\delta_{\infty} C_{\text{com}} / C_2 = (\Delta\delta_{\infty} / C_2) \times \{ (C_2 + C_X + 1/K) - ((C_2 + C_X + 1/K)^2 - 4C_2 C_X)^{0.5} \} / 2$ , where  $C_{\text{com}}$  is an equilibrium concentration of complex in solution,  $C_2$  and  $C_X$  are initial concentrations of **2** and halide in the mixture, and  $\Delta\delta_{\infty}$  is a limiting shift (when all **2** are hydrogen-bonded with iodide). This fitting produced value of  $K = 0.22$ . Note that the dependence of  $\Delta\delta$  on  $[\text{Bu}_4\text{NI}]$  is almost linear (since only a very small fraction of **2** are hydrogen bonded with iodides in the accessible concentration range of Bu<sub>4</sub>NI). Therefore the value of  $\Delta\delta_{\infty} = 2.23$  ppm were taken from the calculated chemical shifts of the protons of **2** (8.11 ppm) and its hydrogen-bonded complex with iodide [2, I<sup>-</sup>] (10.34 ppm) (GIAO <sup>1</sup>H NMR calculations at the M062X/def2trzvpp level in CH<sub>3</sub>CN as a medium). \

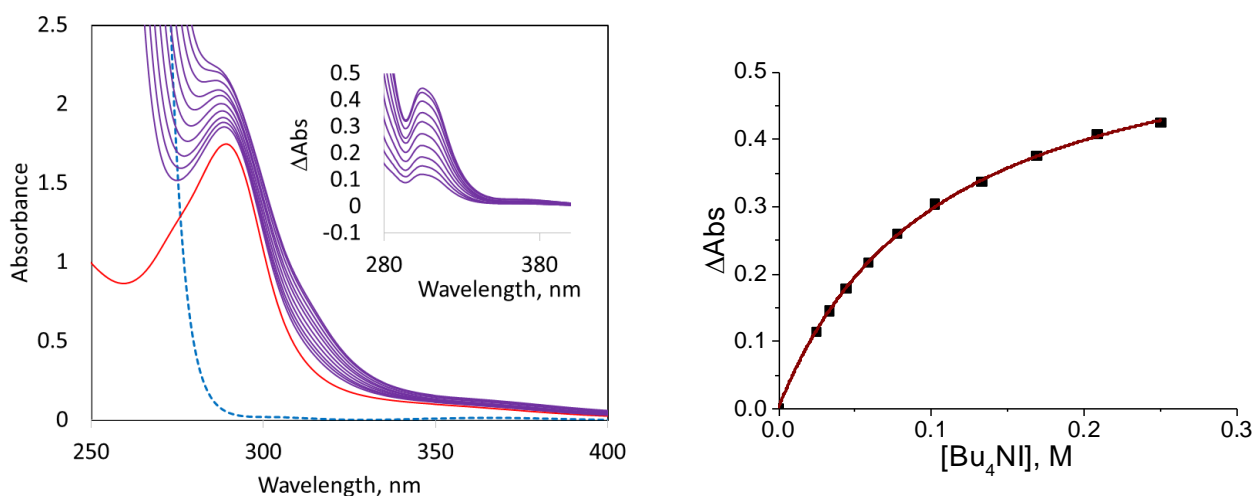

**Figure S4.** Left: Spectra of dichloromethane solutions with constant concentration of **1** (0.85 mM) and various concentrations of Bu<sub>4</sub>NI (solid lines from the bottom to the top). Dashed lines show spectra of the individual solutions of 0.80 mM **1** (red) and of 250 mM Bu<sub>4</sub>NI (blue). Ionic strength was maintained with Bu<sub>4</sub>NPF<sub>6</sub>. Inset: Differential spectra of the solutions obtained by subtraction of the absorption of components from the spectra of their mixtures. (Right) Dependence of differential absorbance  $\Delta\text{Abs}$  (obtained by subtraction of absorption of components from the absorption of the mixture) on the concentration of Bu<sub>4</sub>NI in these solutions.

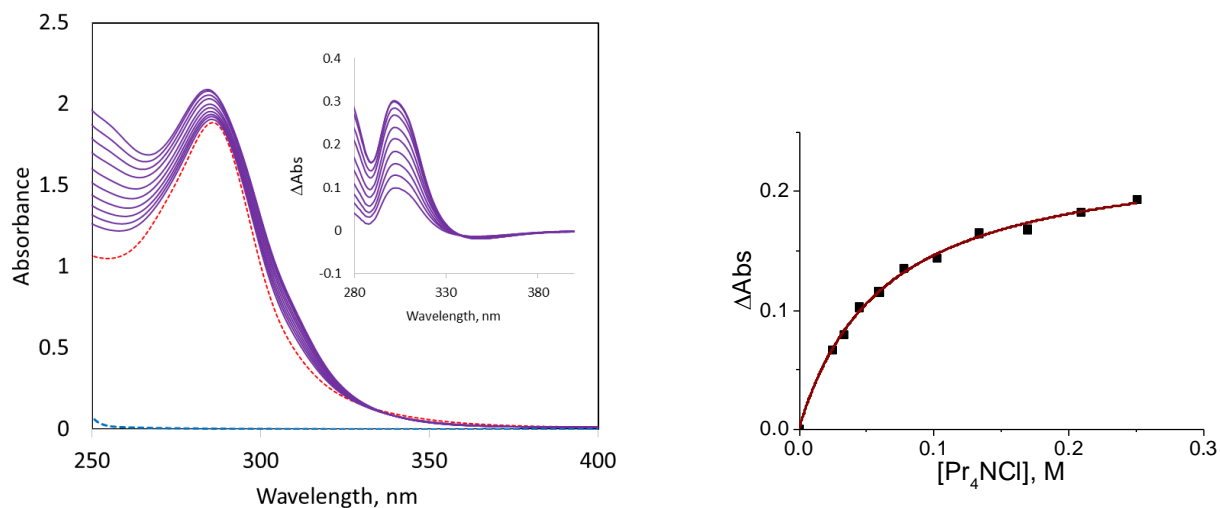

**Figure S5.** Left: Spectra of acetonitrile solutions with constant concentration of **1** (0.80 mM) and various concentrations of Bu<sub>4</sub>NBr (solid lines from the bottom to the top). Dashed lines show spectra of the individual solutions of 0.80 mM **1** (red) and of 250 mM Bu<sub>4</sub>NBr (blue). Ionic strength was maintained with Bu<sub>4</sub>NPF<sub>6</sub>. Inset: Differential spectra of the solutions obtained by subtraction of the absorption of components from the spectra of their mixtures. Right: Dependence of differential absorbance  $\Delta\text{Abs}$  (obtained by subtraction of absorption of components from the absorption of the mixture) on the concentration of Bu<sub>4</sub>NBr in these solutions containing.

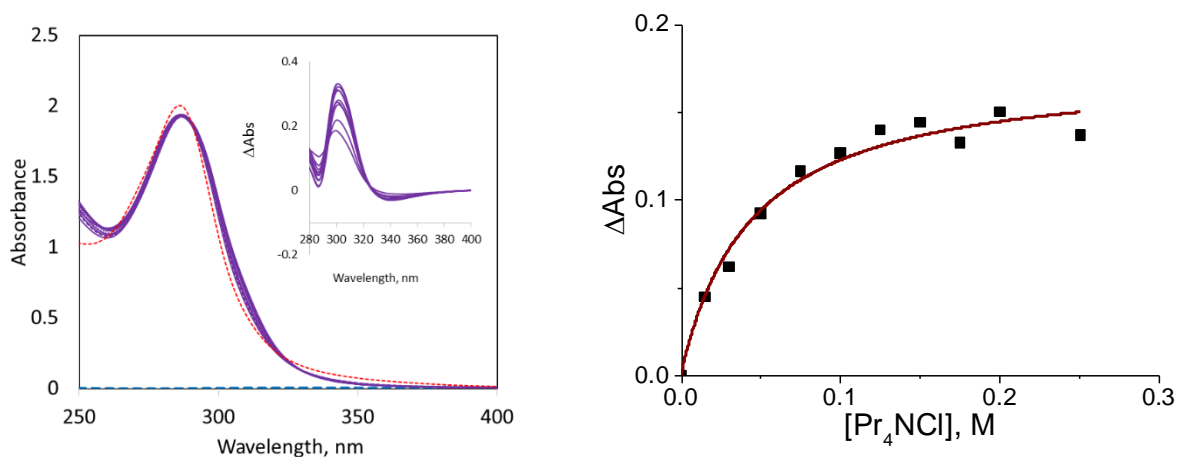

**Figure S6.** Left: Spectra of acetonitrile solutions with constant concentration of **1** (0.80 mM) and various concentrations of Pr<sub>4</sub>NCl (solid lines from the bottom to the top). Dashed lines show spectra of the individual solutions of 0.80 mM **1** (red) and of 250 mM Pr<sub>4</sub>NCl (blue). Ionic strength was maintained with Pr<sub>4</sub>NPF<sub>6</sub>. Inset: Differential spectra of the solutions obtained by subtraction of the absorption of components from the spectra of their mixtures. Right: Dependence of differential absorbance  $\Delta\text{Abs}$  (obtained by subtraction of absorption of components from the absorption of the mixture) on the concentration of Pr<sub>4</sub>NCl in these solutions.

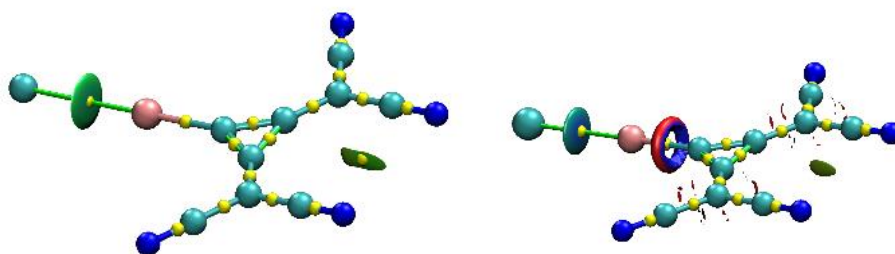

**Figure S7.** Optimized geometries of the  $[1, \text{Br}^-]$  (left) and  $[1, \text{Cl}^-]$  complexes with (3, -1) critical points (yellow spheres) and bond paths (green line) from AIM analysis and the blue-green disc indicating intermolecular attractive interactions resulting from the NCI treatments ( $s = 0.4$  au isosurfaces, a color scale of  $-0.035$  (blue)  $< \rho < 0.02$  (red) au).

**Table S1.** Characteristics of the (3,-1) bond critical points along  $\text{I} \cdots \text{X}^-$  halogen bonds (in a.u.)

| Complex            | $\rho$ (density) | H(Energy density) | $\nabla^2 \rho$ (Laplacian of electron density) |
|--------------------|------------------|-------------------|-------------------------------------------------|
| $[1, \text{I}^-]$  | 1.49E-02         | 4.68E-04          | 3.46E-02                                        |
| $[1, \text{Br}^-]$ | 1.79E-02         | 4.53E-04          | 4.60E-02                                        |
| $[1, \text{Cl}^-]$ | 2.21E-02         | 4.37E-04          | 6.15E-02                                        |

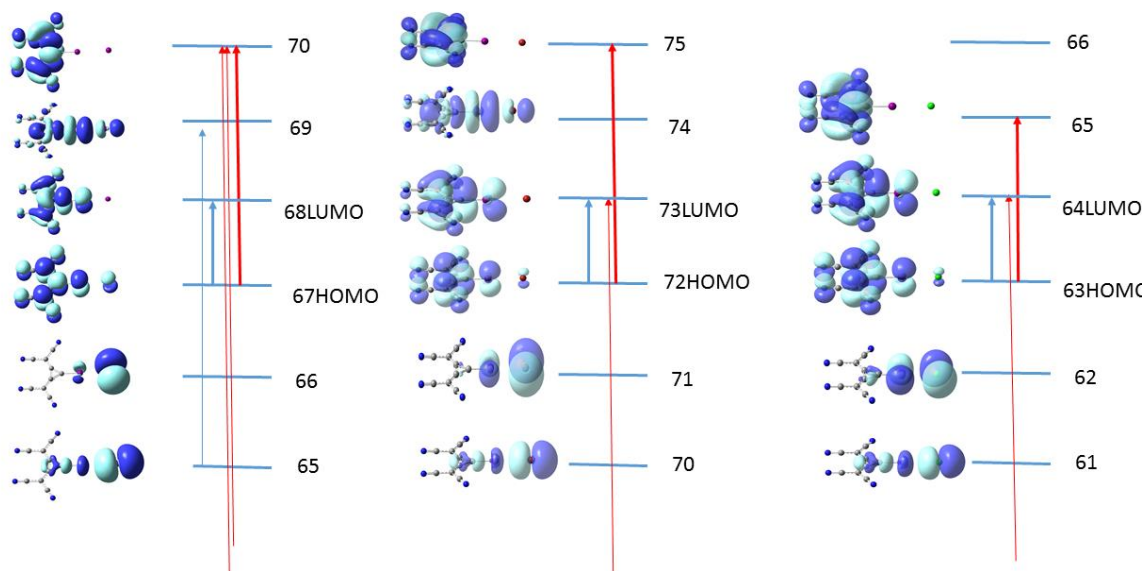

**Figure S8.** MO shapes and energies for  $[1, \text{I}^-]$  (left),  $[1, \text{Br}^-]$  (center) and  $[1, \text{Cl}^-]$  (right). Blue and red arrows represent components of the transitions responsible for the appearance of the lowest-energy absorption bands in the complexes (see details from the output files of TD DFT computations below, note that oscillator strengths of excited state **1** in each case are essentially negligible, and they are not shown).

Excitation energies and oscillator strengths calculated for [1, I<sup>-</sup>]:

Excited State 1: Singlet-A 4.7537 eV 260.82 nm f=0.0051 <S\*\*2>=0.000

61 -> 69 0.17095

67 -> 69 0.66012

67 -> 71 0.10259

Excited State 2: Singlet-A 4.8580 eV 255.22 nm f=0.6738 <S\*\*2>=0.000

65 -> 69 -0.15352

67 -> 68 0.67137

Excited State 3: Singlet-A 4.9441 eV 250.77 nm f=0.7223 <S\*\*2>=0.000

63 -> 68 -0.11512

64 -> 70 0.11454

67 -> 70 0.67911

Excitation energies and oscillator strengths calculated for [1, Br<sup>-</sup>]:

Excited State 1: Singlet-A 4.8664 eV 254.77 nm f=0.0075 <S\*\*2>=0.000

66 -> 74 0.13754

68 -> 77 0.14542

72 -> 74 0.58566

72 -> 76 0.30052

Excited State 2: Singlet-A 4.8866 eV 253.72 nm f=0.5213 <S\*\*2>=0.000

72 -> 73 0.69240

Excited State 3: Singlet-A 4.9458 eV 250.69 nm f=0.7170 <S\*\*2>=0.000

68 -> 73 -0.11416

72 -> 75 0.68518

Excitation energies and oscillator strengths for [1, Cl<sup>-</sup>]:

Excited State 1: Singlet-A 4.9035 eV 252.85 nm f=0.0210 <S\*\*2>=0.000

59 -> 68 -0.26929

63 -> 64 -0.11527

63 -> 66 0.29147

63 -> 67 0.53349

Excited State 2: Singlet-A 4.9066 eV 252.69 nm f=0.4459 <S\*\*2>=0.000

63 -> 64 0.68575

Excited State 3: Singlet-A 4.9479 eV 250.58 nm f=0.7169 <S\*\*2>=0.000

59 -> 64 -0.11330

63 -> 65 0.68017

**Table S2.** Energies and HOMO/LUMO energies of the complexes and individual reactants (M06-2X/def2tzvpp calculations, PCM model)

|                       | Solvent                         | E, Hartree   | E+ZPE, Hartree | E(HOMO), eV | E(LUMO), eV |
|-----------------------|---------------------------------|--------------|----------------|-------------|-------------|
| [1, I <sup>-</sup> ]  | CH <sub>3</sub> CN              | -1157.451835 | -1157.387045   | -0.25026    | 0.00922     |
| [1, Br <sup>-</sup> ] | CH <sub>3</sub> CN              | -3434.011928 | -3433.946936   | -0.24975    | 0.01048     |
| [1, Cl <sup>-</sup> ] | CH <sub>3</sub> CN              | -1320.007332 | -1319.942294   | -0.24873    | 0.01217     |
| [1, I <sup>-</sup> ]  | CH <sub>2</sub> Cl <sub>2</sub> | -1157.433215 | -1157.368343   | -0.23414    | 0.02483     |
| <b>1</b>              | CH <sub>3</sub> CN              | -859.6273823 | -859.562732    | -0.25604    | -0.00746    |
| I <sup>-</sup>        | CH <sub>3</sub> CN              | -297.818415  | -297.818415    | -0.26435    | 0.21877     |
| Br <sup>-</sup>       | CH <sub>3</sub> CN              | -2574.37678  | -2574.37678    | -0.27940    | 0.31332     |
| Cl <sup>-</sup>       | CH <sub>3</sub> CN              | -460.370291  | -460.370291    | -0.28893    | 0.43374     |
| I <sup>-</sup>        | CH <sub>2</sub> Cl <sub>2</sub> | -297.810083  | -297.810083    | -0.24750    | 0.23449     |



**Table S3.** Calculated characteristics of the hypothetical anion- $\pi$  [**1**, X<sup>-</sup>] complexes.<sup>a</sup>

| Complex                   | $\Delta E$ , kJ mol <sup>-1</sup> | $\lambda_{\max}$ , nm | $10^{-4}\epsilon$ , M <sup>-1</sup> cm <sup>-1</sup> |
|---------------------------|-----------------------------------|-----------------------|------------------------------------------------------|
| <b>1</b> ·I <sup>-</sup>  | 0.7                               | 252                   | 3.76                                                 |
| <b>1</b> ·Br <sup>-</sup> | 4.6                               | 252                   | 3.46                                                 |
| <b>1</b> ·Cl <sup>-</sup> | 6.9                               | 251                   | 3.80                                                 |

a) From M06-2X/def2tzvpp calculations, In CH<sub>3</sub>CN, PCM model.

Atomic coordinates of the optimized AEXB complexes

|                                                        |             |             |             |                                             |             |             |             |
|--------------------------------------------------------|-------------|-------------|-------------|---------------------------------------------|-------------|-------------|-------------|
| <b>[1, I<sup>-</sup>] CH<sub>3</sub>CN</b>             |             |             |             | <b>[1, Br<sup>-</sup>] CH<sub>3</sub>CN</b> |             |             |             |
| I                                                      | 0.74561200  | -0.04678700 | -0.01608500 | I                                           | 1.25029400  | -0.00020500 | -0.00001400 |
| N                                                      | -1.77282400 | 4.10762300  | -0.00658700 | N                                           | -1.37232600 | 4.11671800  | -0.02427500 |
| C                                                      | -1.30316400 | -0.01995800 | -0.01162700 | C                                           | -0.80107500 | -0.00017200 | -0.00000300 |
| N                                                      | -5.68510000 | 2.04487600  | 0.02168800  | N                                           | -5.23235800 | 1.95630000  | 0.04622300  |
| C                                                      | -2.48905700 | -0.69742000 | -0.00384000 | C                                           | -1.97189400 | -0.70396400 | 0.00017400  |
| C                                                      | -2.38275200 | 3.12932000  | -0.00292200 | C                                           | -1.95792500 | 3.12363400  | -0.01190200 |
| C                                                      | -3.12129500 | 1.92169900  | 0.00144000  | C                                           | -2.66638900 | 1.89839300  | 0.00115100  |
| N                                                      | -5.78229600 | -1.85968500 | 0.01984900  | N                                           | -5.23287700 | -1.95519300 | -0.04618800 |
| C                                                      | -2.45625900 | 0.71128200  | -0.00407200 | C                                           | -1.97173900 | 0.70388500  | -0.00015600 |
| N                                                      | -1.98151800 | -4.12524600 | -0.00401800 | N                                           | -1.37308200 | -4.11676400 | 0.02422400  |
| C                                                      | -4.53377700 | 1.98535600  | 0.01237800  | C                                           | -4.07990700 | 1.92697300  | 0.02396600  |
| C                                                      | -3.21506300 | -1.87256300 | 0.00202500  | C                                           | -2.66687900 | -1.89829000 | -0.00114600 |
| C                                                      | -2.54019600 | -3.11680200 | -0.00126800 | C                                           | -1.95879200 | -3.12374500 | 0.01189500  |
| C                                                      | -4.62932000 | -1.86217900 | 0.01176900  | C                                           | -4.08040900 | -1.92644300 | -0.02393300 |
| I                                                      | 4.28415200  | 0.00442100  | 0.01156000  | Br                                          | 4.54682800  | 0.00005100  | 0.00001700  |
| <b>[1, I<sup>-</sup>] CH<sub>2</sub>Cl<sub>2</sub></b> |             |             |             | <b>[1, Cl<sup>-</sup>] CH<sub>3</sub>CN</b> |             |             |             |
| I                                                      | -0.75284700 | -0.07080700 | 0.04252100  | I                                           | 1.81581100  | -0.06615900 | 0.00073900  |
| N                                                      | 1.72847800  | 4.10777500  | 0.01823500  | N                                           | -0.74975400 | 4.10492700  | 0.01712400  |
| C                                                      | 1.29824800  | -0.03179400 | 0.03164900  | C                                           | -0.23997900 | -0.02303700 | 0.00163500  |
| N                                                      | 5.65467500  | 2.09642100  | -0.05634500 | N                                           | -4.64064000 | 2.00224700  | -0.03381900 |
| C                                                      | 2.49297600  | -0.69483100 | 0.01078700  | C                                           | -1.42373100 | -0.70626700 | 0.00145800  |
| C                                                      | 2.34314800  | 3.13246400  | 0.00850400  | C                                           | -1.34957100 | 3.12018800  | 0.00860700  |
| C                                                      | 3.09339000  | 1.93163800  | -0.00292600 | C                                           | -2.07588000 | 1.90574100  | -0.00034600 |
| N                                                      | 5.80492900  | -1.80665600 | -0.05564300 | N                                           | -4.70361800 | -1.91179700 | 0.03327600  |
| C                                                      | 2.44303600  | 0.71321800  | 0.01167500  | C                                           | -1.40001300 | 0.69963400  | 0.00125000  |
| N                                                      | 2.05285600  | -4.13716100 | 0.01117500  | N                                           | -0.87347300 | -4.12680700 | -0.01438400 |
| C                                                      | 4.50492300  | 2.01510500  | -0.03202400 | C                                           | -3.48857100 | 1.95571100  | -0.01726900 |
| C                                                      | 3.23800000  | -1.85829900 | -0.00542200 | C                                           | -2.13683300 | -1.89083000 | 0.00251900  |
| C                                                      | 2.58745700  | -3.11573100 | 0.00330000  | C                                           | -1.44595900 | -3.12592700 | -0.00613200 |
| C                                                      | 4.65225900  | -1.82484000 | -0.03248700 | C                                           | -3.55058800 | -1.89919300 | 0.01805700  |
| I                                                      | -4.27747700 | 0.00619900  | -0.03082800 | Cl                                          | 4.89393300  | -0.16076300 | -0.00330100 |
